# Supplementary material for: Predictive value of 18F-FDG PET/CT for evaluating the response to hypofractionated radiotherapy combined with PD-1 blockade in non-small cell lung cancer
Source: Front Immunol. 2023 Feb 13;14:1034416. doi: 10.3389/fimmu.2023.1034416 (PMC9969129; doi:10.3389/fimmu.2023.1034416)
Supplement: Supplementary file 1 [file Table_1.xlsx]

## Sheet: Sheet1
Patient no.	Baseline ECOG	ECOG-1	ECOG-2	ECOG-3	Baseline SUVmax(average)	SUVmax-1(average)	SUVmax-2(average)	SUVmax-3（(average）	Baseline SULpeak(average)	SULpeak-1(average）	SULpeak-2(average)	SULpeak-3(average)	Baseline MTV(average)	MTV-1(average)	MTV-2(average)	MTV-3(average)	Baseline TLG(average)	TLG-1(average)	TLG-2(average)	TLG-3(average)
1	1	1	2	3	5.11	2.88	3.4	4.16	3.44	1.95	1.77	2.72	13.1	13.52	13.89	12.29	69.08	31.97	38.59	30.02
2	1	1	1	1	5.59	4.66	3.38	3.261	2.44	2.49	1.73	1.74	4.05	7.4	7.21	3.1	16.46	19.27	14.23	6.04
3	1	1	1	1	13.97	16.03	14.487	12.706	9.09	9.657	8.837	8.72	12.91	4.8	5.904	18.624	114.94	45.497	52.278	141.531
4	2	2	2	3	5.93	7.77	9.45	12.05	3.74	4.86	5.51	5.73	7.96	11.1	20.61	11.98	28.62	61.93	23.88	87.45
5	2	2	2	2	6.2	8.94	7.34	9.13	4.15	5.8	4.87	6.38	8.85	7.32	9.67	19.57	43.52	40.14	42.75	154.05
6	1	1	1	1	8.29	4.71	4.75	5.23	5.7	2.71	3.1	3.23	12.37	4.69	5.44	3.47	77.61	14.54	20.93	12.45
7	1	1	1	1	6.8	8.69	6.62	6.31	3.62	4.72	3.54	3.18	7.152	5.63	6.12	4.22	29.34	32.82	34.2	17.07
8	2	2	1	1	6.15	2.71	2.3	2.12	4.18	1.92	1.71	1.53	5.93	10.08	15.94	12.61	34.23	17.37	22.76	16.59
9	1	1	1	1	13.66	3.93	1.5	unavailable	8.53	2.72	1.02	unavailable	6.08	3.9	2.24	unavailable	57.978	9.8	2.34	unavailable
10	1	1	1	1	5.65	3.36	3.64	2.96	2.904	1.57	2.26	1.91	3.66	12.67	14.5	17.86	11.407	8.37	31.56	35.3
11	2	2	2	2	5.44	2.61	3.86	4.81	3.23	1.44	2.09	2.63	5.66	9.5	11.49	15.73	18.49	14.7	24.86	48.77
12	2	2	2	3	13.43	11.35	14.71	14.71	9.18	7.59	9.68	9.28	11.36	6.64	7.02	14.43	108.23	60.71	90.66	161.99
13	1	1	1	1	4.75	5.07	5.04	5.83	8.25	2.23	2.44	2.7	2.85	4.38	4.42	4.23	2.32	12.1	13.92	16.21
14	1	1	1	2	11.17	5.28	7.94	5.97	7.604	3.53	5.46	4.12	19.44	7.44	9.74	33.22	131.55	21.91	48.63	38.17
15	1	1	1	1	8.49	6.9	6.41	5.63	4.904	4.06	3.71	3.48	12.98	9.41	8.8	7.62	72.59	34.21	25.44	21.06
16	1	1	1	1	7.94	4.63	3.56	5.6	5.18	2.97	2.11	3.22	10.848	22.32	23.57	7.69	52.92	53.39	49	22.76
17	2	2	2	2	4.92	5.83	3.3	2.51	2.71	2.91	1.93	1.53	10.67	10.19	26.32	18.39	22.28	36.73	46.39	35.67
18	1	1	1	1	4.96	5.51	1.97	2.21	2.86	3	1.15	1.29	3.82	2.96	1.15	0.62	11.98	9.59	1.58	1.03
19	1	2	1	1	7.05	3.78	3.54	3.91	4.36	2.47	2.18	2.32	17.42	6.19	3.46	4.79	84.6	12.5	6.87	7.86
20	2	2	2	2	3.52	3.16	3.57	2.88	1.99	2.11	2.35	1.82	4.03	3.55	6	3.5	8.01	10.17	14.44	6.31
21	2	2	2	2	14.73	4.79	4.88	9.01	8.92	2.86	2.81	4.73	6.96	3.55	2.54	2.97	70.55	9.52	7.22	15.35
22	2	2	3		6.69	11.96	7.16		2.53	7.04	4.86		65.62	15.19	36.84		360.26	110.93	222.24
23	2	2	2		9.93	5.86	10.76		5.87	2.89	6.02		6.12	6.32	3.68		44.62	20.13	23.24
24	2	3	3		4.74	5.84	6.35		2.72	3.33	3.33		4.76	8.86	7.92		15.66	30.33	29.37
25	1	1	2		2.53	4.15	4.72		1.46	2.59	2.94		8.352	6.18	7.67		11.47	14.78	21.43
26	2	2	2		7.62	3.95	7.92		3.91	2.22	4.53		15.18	11.75	3.89		103.9	35.21	18.91
27	2	3			4.83	5.21			2.8	3.17			4.53	5.79			11.03	16.33
28	2	3			7.9	6.73			5.19	4.43			67.28	26.6			375.97	108.55
29	2	2			6.36	4.58			3.77	2.74			17.23	20.3			56.12	53.72
30	2	3			5.04	11.9			3.53	7.81			5.4	50.22			81.96	370.59
31	2	2			14.32	9.67			9.05	4.96			7.2	4.1			62.48	35.75
32	2	3			5.92	8.76			3.77	4.85			13.12	24.41			45.95	127.26
33	2	2			9.8	7.23			5.98	4.84			4.87	16.42			23.31	48.24
34	2	2			10.07	10			6.88	6.66			11.62	22.6			87.72	156.53
35	2	2			7.72	6.53			5.12	3.75			13.26	5.05			144.83	19.94
36	2	2			10.81	5.13			6.12	3.1			7.35	21.03			55.67	59.73
37	1	2			6.36	5.37			3.77	3.49			17.23	12.34			56.12	33.23
38	2	2			10.19	13.2			6.95	7.92			54.05	21.47			322.64	163.05
39	1	1			6.88	9.61			4.53	6.57			17.78	10.53			77.36	56.89
40	1	1			2.13	1.84			1.33	1.15			13.87	15.84			16.78	17.82
41	1	1			16.23	5.3			8.94	2.37			6.55	6.66			9.12	15.1
